# Supplementary material for: Microscale and Macroscale Deformation Behavior of Electrospun Polymeric Nanofiber Membranes Using In Situ SEM during Mechanical Testing
Source: MDPI journal article supplement (doi:10.3390/polym15071630), 2023-03-24
Supplement: s1 [file s1]

# Microscale and macroscale deformation behavior of electrospun polymeric nanofiber membranes using in-situ SEM during mechanical testing

Olivier Verschate, Eva Loccufier, Bianca Swankaert, Karen De Clerck and Lode Daelemans\*

Department of Materials, Textiles and Chemical Engineering (MaTCh), Faculty of Engineering and Architecture, Ghent University, Technologiepark 70A, 9052 Ghent, Belgium

\* Correspondence: Corresponding author: Lode.Daelemans@UGent.be

## Supporting information

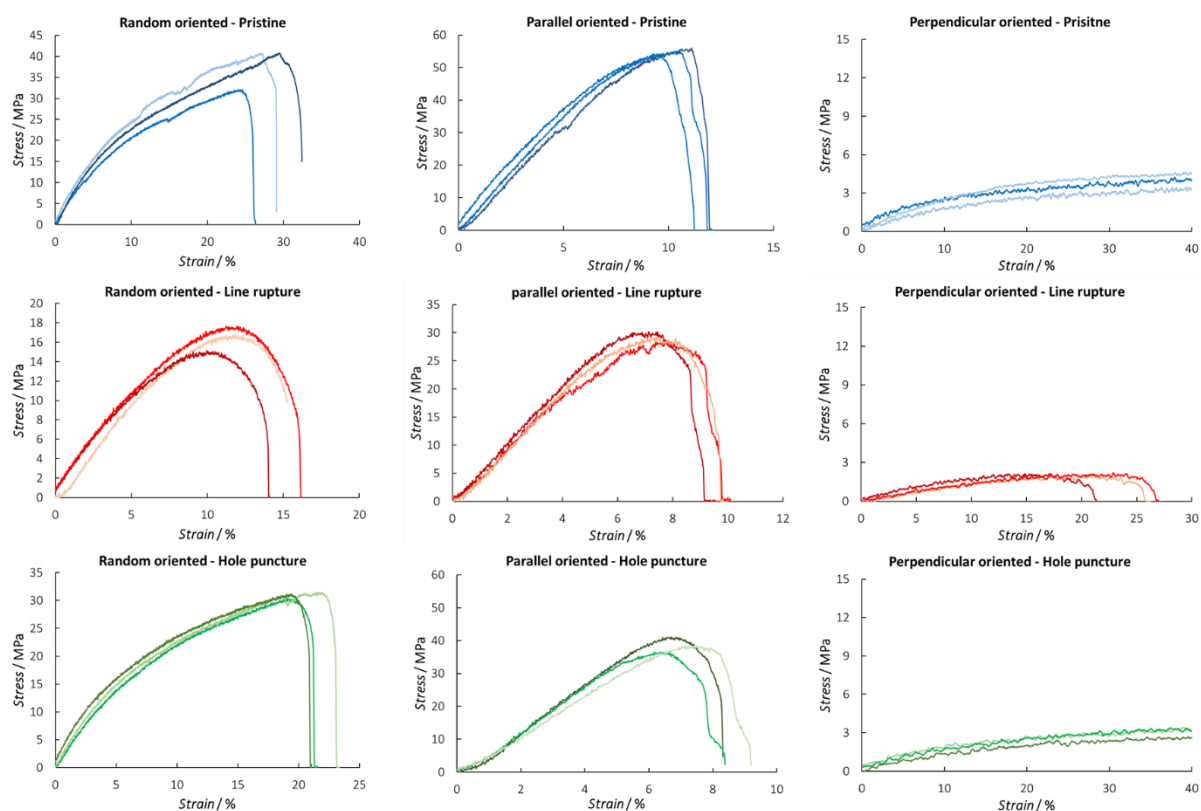

Figure S1: Overview of all stress strain curves grouped per orientation and damage type.

### Random oriented

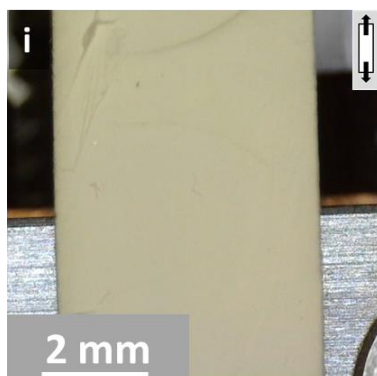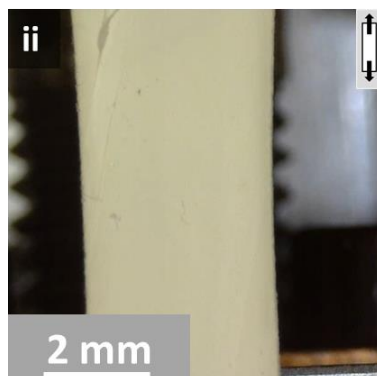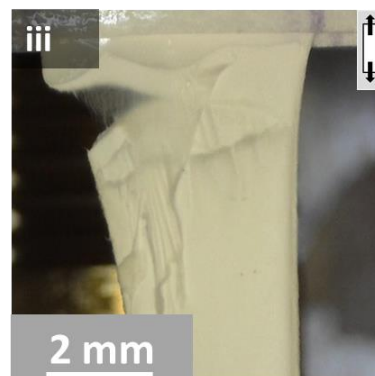

### Parallel oriented

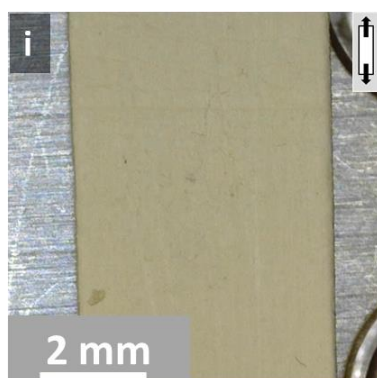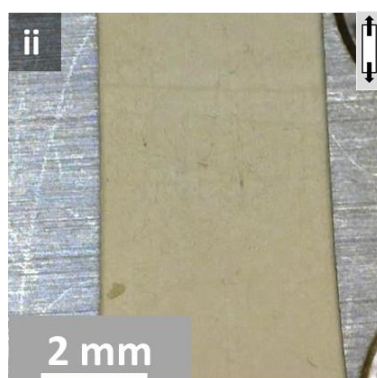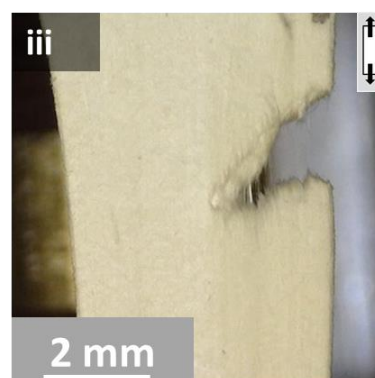

### Perpendicular oriented

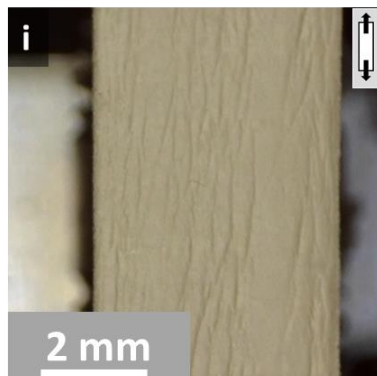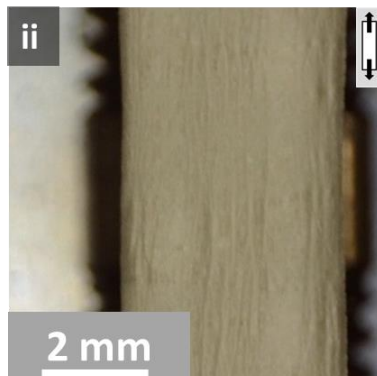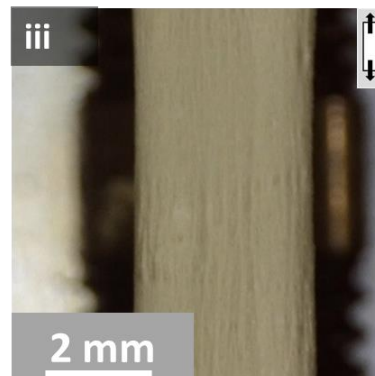

Figure S2: Subsequent deformation images of random, parallel, and perpendicular oriented membranes. Similar behavior is observed for the three different kinds of membranes.

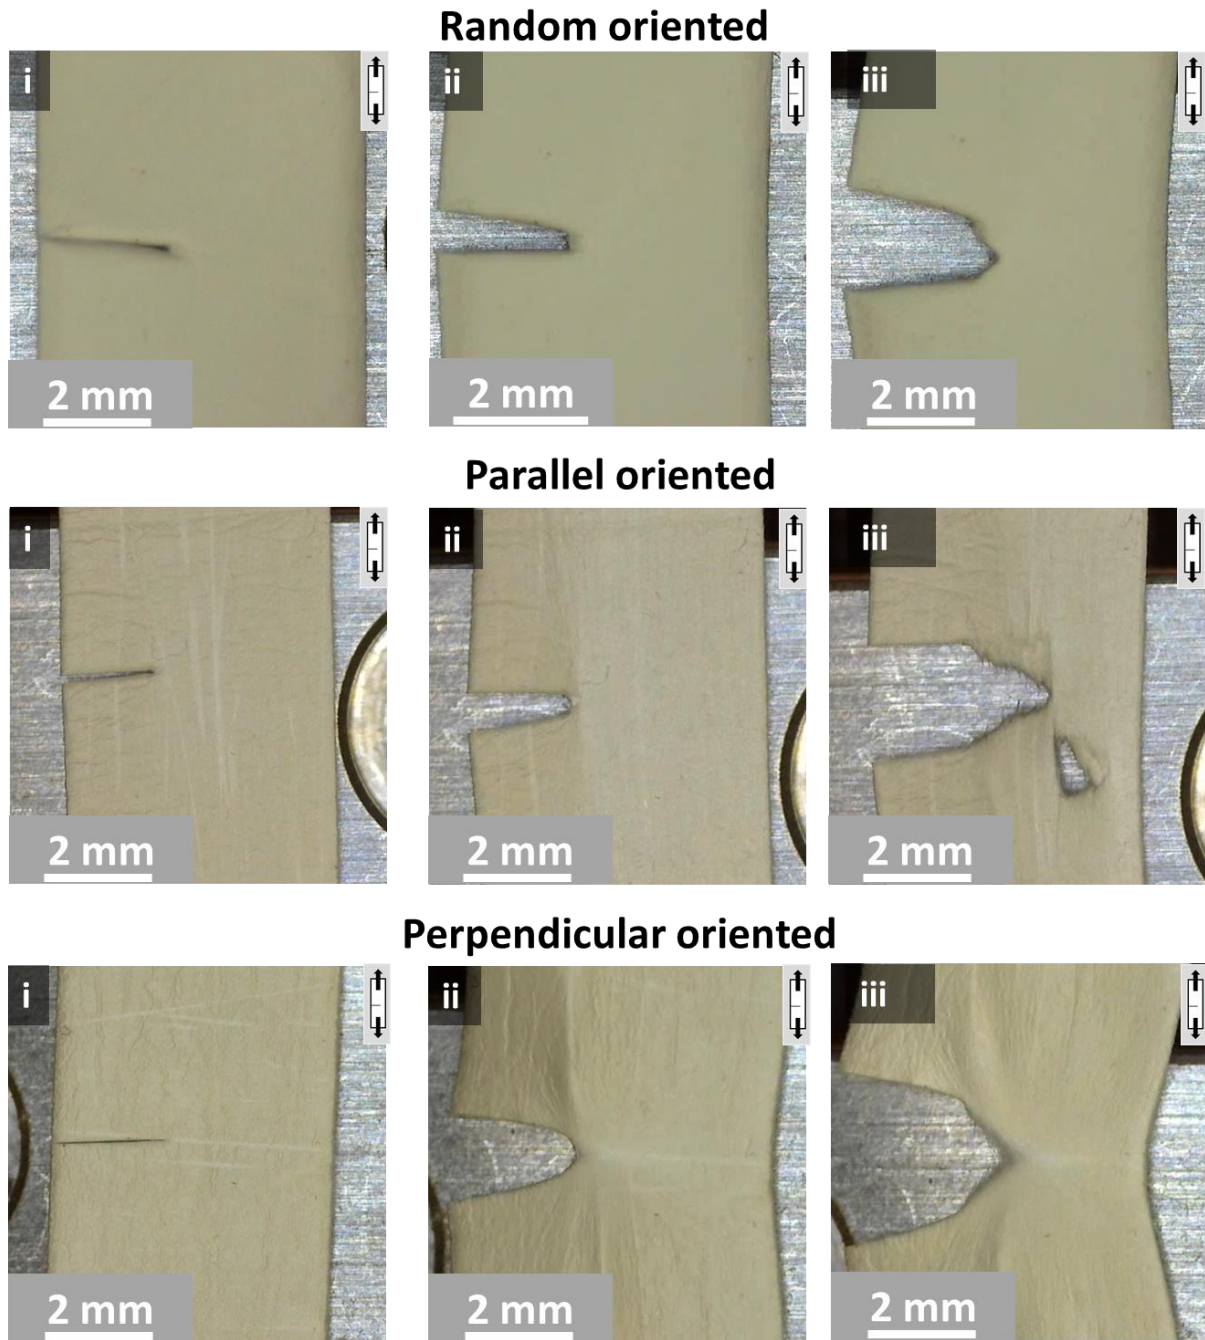

Figure S3: Subsequent deformation images of random, parallel, and perpendicular oriented membranes pre-damaged with a line rupture. Similar behavior macroscopic behavior of crack opening and propagation is observed up to the point of final fracture.

### Random oriented

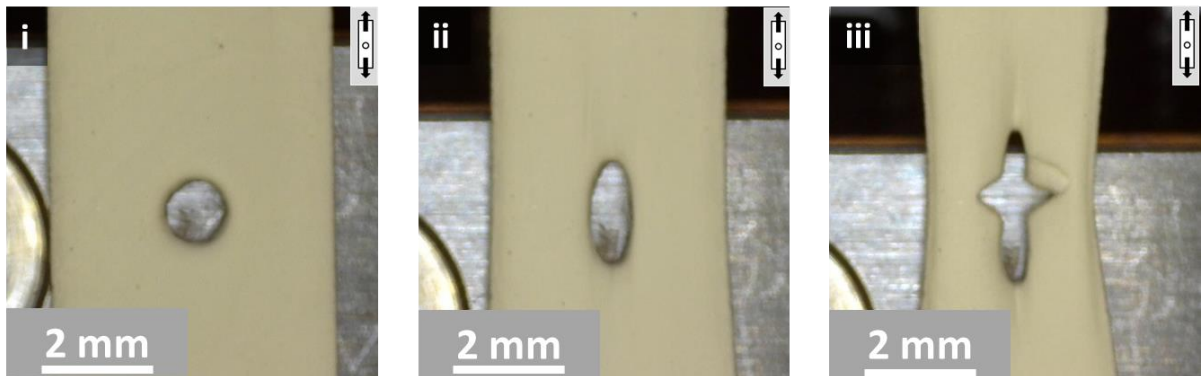

### Parallel oriented

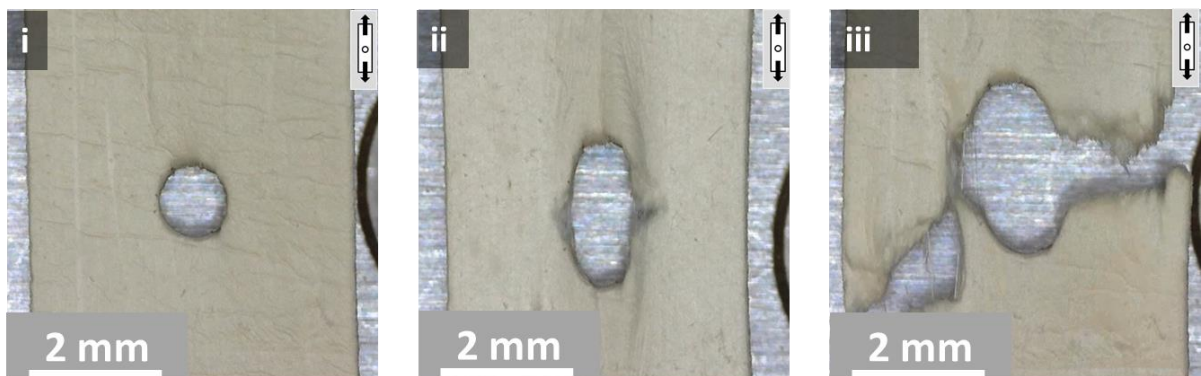

### Perpendicular oriented

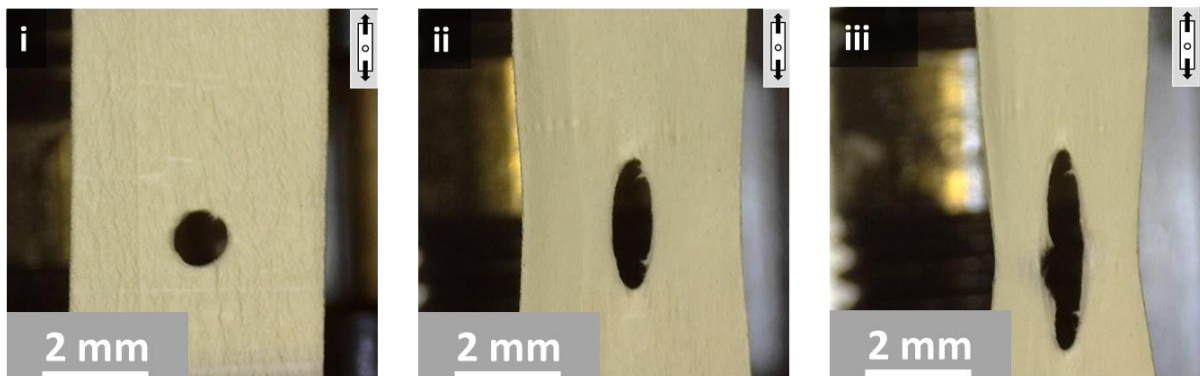

Figure S4: Subsequent deformation images of random, parallel, and perpendicular oriented membranes pre-damaged with a puncture. Similar behavior macroscopic behavior of hole elongation, crack initiation, and propagation is observed.



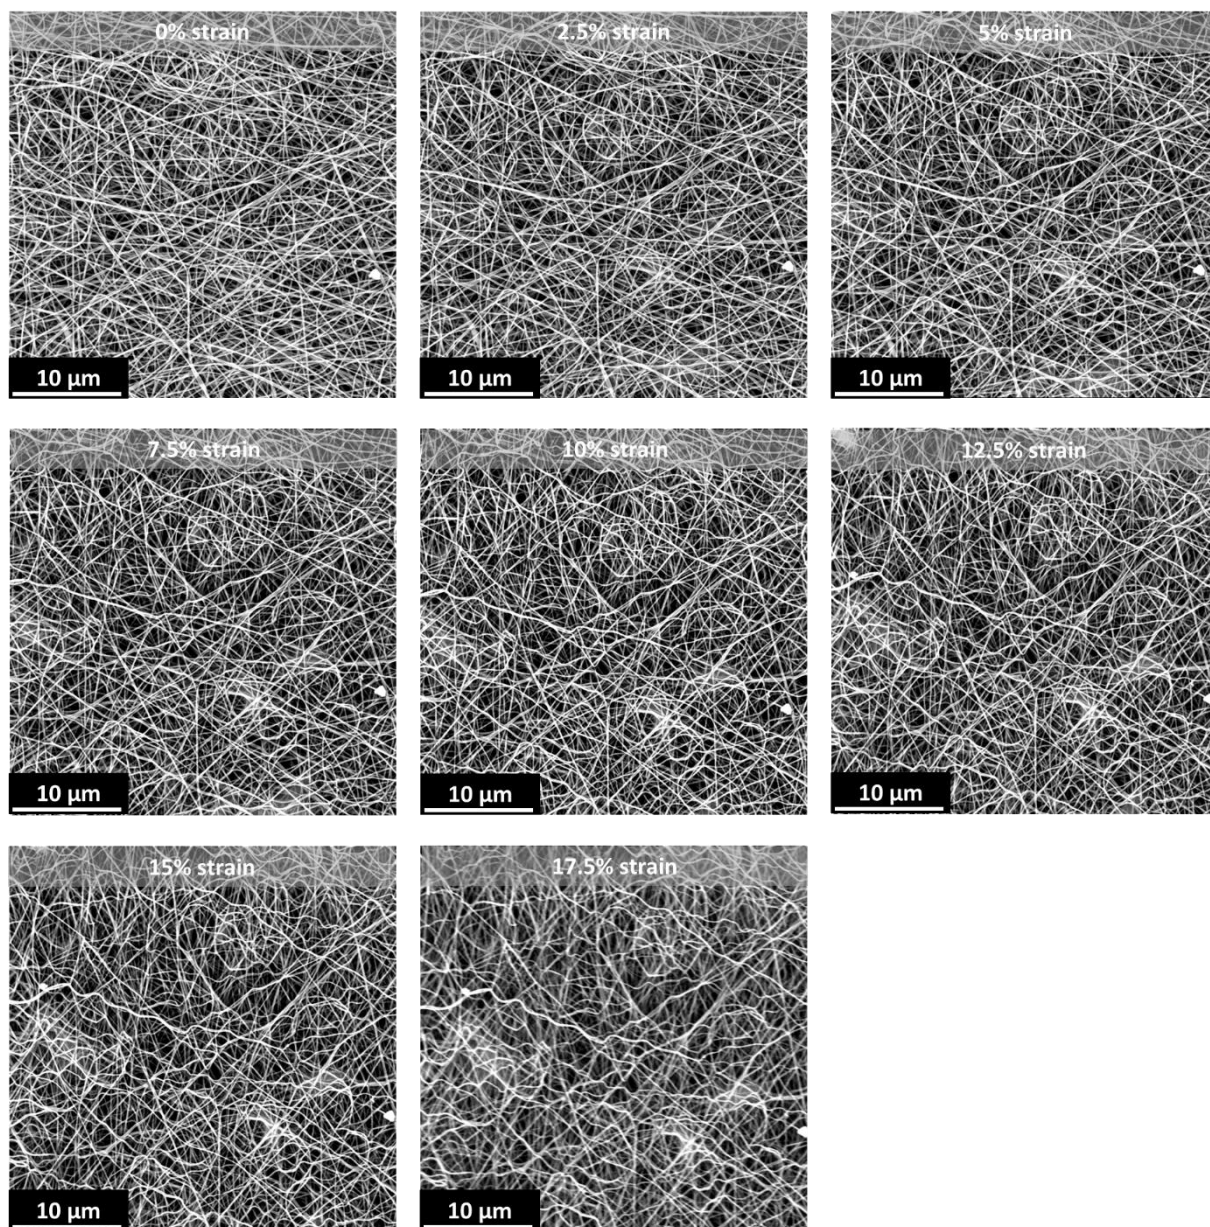

Figure S5: Subsequent SEM deformation images of a pristine random oriented nanofiber membrane.

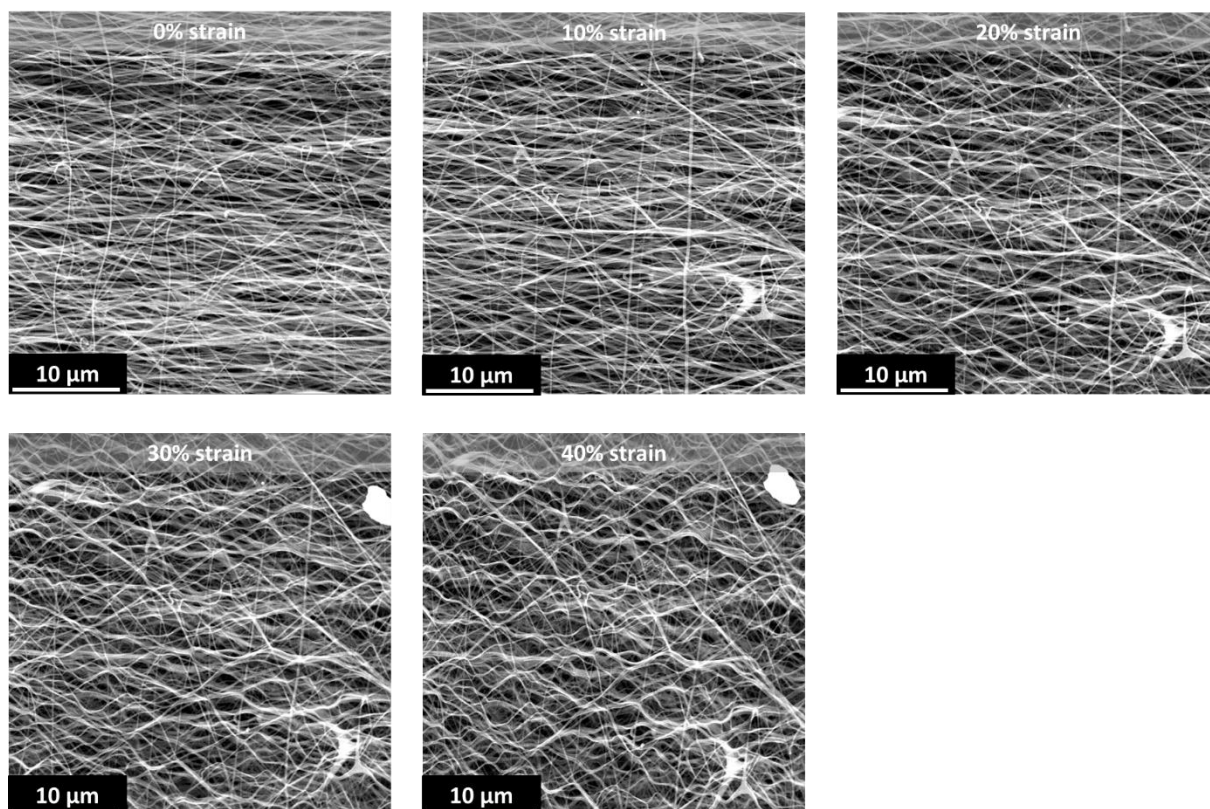

Figure S6: Subsequent images of a pristine parallel oriented nanofiber membrane.
